# Supplementary material for: Overexpression of Twist1 in vascular endothelial cells promotes pathological retinal angiogenesis in mice
Source: PubMed Central journal article supplement — Zool Res. 2022 Jan 18;43(1):64–74. doi: 10.24272/j.issn.2095-8137.2021.281 (PMC8743260; doi:10.24272/j.issn.2095-8137.2021.281), 2022-01-18
Supplement: zr-43-1-64-S1.pdf [file zr-43-1-64-S1.pdf]

## Supplementary Materials

**Supplementary Table S1.** Primers used for mouse genotyping.

| Primers   | Sequence                       |
|-----------|--------------------------------|
| Twist1-F3 | 5'-CACTTGCTCTCCCAAAGTCGCTC-3'  |
| Twist1-R3 | 5'-ATACTCCGAGGCGGATCACAA-3'    |
| Twist1-F2 | 5'-GCATCTGACTTCTGGCTAATAAAG-3' |
| Twist1-F5 | 5'-GGCAACGTGCTGGTTATTGTG-3'    |
| Twist1-R5 | 5'-CGGAGAGACTGGCGAGCTGGA-3'    |
| Twist1-F6 | 5'-AGATCTGCAAGCTAATTCCTGC-3'   |

**Supplementary Table S2.** Primers used for RT-PCR and RT-qPCR

| Genes  | Species | Primers    | Sequence                   |
|--------|---------|------------|----------------------------|
| GAPDH  | Human   | GAPDH-H-F  | 5'-AAGGTGAAGGTCGGAGTCAA-3' |
|        |         | GAPDH-H-R  | 5'-AATGAAGGGGTCATTGATGG-3' |
| Gapdh  | Mouse   | Gapdh-M-F  | 5'-CGTCCCGTAGACAAAATGGT-3' |
|        |         | Gapdh-M-R  | 5'-TTGATGGCAACAATCTCCAC-3' |
| Twist1 | Mouse   | Twist1-M-F | 5'-AGTCTTACGAGGAGCTGCAG-3' |
|        |         | Twist1-M-R | 5'-AGGAAGTCGATGTACCTGGC-3' |
| TWIST1 | Human   | TWIST1-H-F | 5'-AGTCTTACGAGGAGCTGCAG-3' |
|        |         | TWIST1-H-R | 5'-AGGAAGTCGATGTACCTGGC-3' |
| COL1A1 | Human   | COL1A1-H-F | 5'-AGCAAGAGGCGAGAGAGGTT-3' |
|        |         | COL1A1-H-R | 5'-GAGAGCCATCAGCACCTTTG-3' |
| THBS2  | Human   | THBS2-H-F  | 5'-AGCGTCAGATGTGCAACAAG-3' |
|        |         | THBS2-H-R  | 5'-ACACTCGTCCAGGTCCTCAC-3' |
| FST    | Human   | FST-H-F    | 5'-GACTGTGGACCTGGGAAAAA-3' |
|        |         | FST-H-R    | 5'-GAGCTGCCTGGACAGAAAAC-3' |
| PDGFC  | Human   | PDGFC-H-F  | 5'-GTTGAGGAACCCAGTGATGG-3' |
|        |         | PDGFC-H-R  | 5'-CTGAAGGGGGTAGCACTGAA-3' |
| FAP    | Human   | FAP-H-F    | 5'-GAAAGCAGAAGTGGATGGGC-3' |
|        |         | FAP-H-R    | 5'-CCTCCCCTTGCCACTTGTA-3'  |
| LOX    | Human   | LOX-H-F    | 5'-CGACCCTTACAACCCCTACA-3' |
|        |         | LOX-H-R    | 5'-GTGGACGCCTGGATGTAGTA-3' |
| JAG1   | Human   | JAG-H-F    | 5'-ACTCATCAGCCGTGTCTCAA-3' |
|        |         | JAG1-H-R   | 5'-GTTTGTAGAGCATGTGGGGC-3' |
| PCSK5  | Human   | PCSK5-H-F  | 5'-CACGGACATGGTTGAAGCAA-3' |
|        |         | PCSK5-H-R  | 5'-CCAAACAAACACAGAGCCGA-3' |
| COL8A1 | Human   | COL8A1-H-F | 5'-ATTCCTCCTCAGATGCCACC-3' |
|        |         | COL8A1-H-R | 5'-GGACCTTGTTCCCCTCGTAA-3' |
| RSPO3  | Human   | RSPO3-H-F  | 5'-GCCTTGACAATTGCCAGAA-3'  |
|        |         | RSPO3-H-R  | 5'-CCCGTGTTTCAGTCCCTCTT-3' |
| MMP19  | Human   | MMP19-H-F  | 5'-AGATGATGTGGCAGGGATCC-3' |

|           |       |            |                                |
|-----------|-------|------------|--------------------------------|
|           |       | MMP19-H-R  | 5'-GCCCGGTCCTGAATCTGATA-3'     |
| PRRX1     | Human | PRRX1-H-F  | 5'-TTTGGAGCGTGTCTTTGAGC-3'     |
|           |       | PRRX1-H-R  | 5'-GCAGTCACGTCTCCTGAGTA-3'     |
|           |       | UNC5B-H-F  | 5'-CACCATCTGCCAGTCGAT-3'       |
| UNC5B     | Human | UNC5B-H-R  | 5'-TGTTGGGGTCGCTTAGAGTT-3'     |
|           |       | HGF-H-F    | 5'-AATTCCATGTCAGCGTTGGG-3'     |
| HGF       | Human | HGF-H-R    | 5'-CGGATGTTTGGATCAGTGGT-3'     |
|           |       | DCN-H-F    | 5'-GCGTGCCCATGAGAATGAG-3'      |
| DCN       | Human | DCN-H-R    | 5'-GCGGATGTAGGAGAGCTTCT-3'     |
|           |       | CD31-H-F   | 5'-AGCACAGTGGCAACTACACG-3'     |
| CD31      | Human | CD31-H-R   | 5'-GGAGCAGGACAGGTTTCAGTC-3'    |
|           |       | NOTCH2-H-F | 5'-TCCTGTACTCCAGGCTCCAC-3'     |
| NOTCH2    | Human | NOTCH2-H-R | 5'-CATTTAGGGGGTTGGTGTCA-3'     |
|           |       | HES1-H-F   | 5'-CGGACATTCTGGAAATGACA-3'     |
| HES1      | Human | HES1-H-R   | 5'-CATTGATCTGGGTCATGCAG-3'     |
|           |       | HEY2-H-F   | 5'-CTTGTGCCAACTGCTTTTGA-3'     |
| HEY2      | Human | HEY2-H-R   | 5'-GCACTCTCGGAATCCTATGC-3'     |
|           |       | CLDN5-H-F  | 5'-ATGTGGCAGGTGACCGCCTTC-3'    |
| CLDN5     | Human | CLDH5-H-R  | 5'-CGAGTCGTACACTTTGCACTGC-3'   |
|           |       | CCND1-H-F  | 5'-TCTACACCGACAACCTCCATCCG-3'  |
| CYCLIN D1 | Human | CCND1-H-R  | 5'-TCTGGCATTTTGGAGAGGAAGTG-3'  |
|           |       | AXIN2-H-F  | 5'-CAAACCTTTCGCCAACCGTGGTTG-3' |
| AXIN2     | Human | AXIN2-H-R  | 5'-GGTGCAAAGACATAGCCAGAACC-3'  |
|           |       | LEF1-H-F   | 5'-CTACCCATCCTCACTGTCAGTC-3'   |
| LEF1      | Human | LEF1-H-R   | 5'-GGATGTTCTGTGTTGACCTGAGG-3'  |
|           |       | C-JUN-H-F  | 5'-CCTTGAAAGCTCAGAACTCGGAG-3'  |
| C-JUN     | Human | C-JUN-H-R  | 5'-TGCTGCGTTAGCATGAGTTGGC-3'   |
|           |       | THBS2-H-F  | 5'-GTATGGAGGGAAGGACTGTGTC-3'   |
| THBS2     | Mouse | THBS2-H-R  | 5'-ACTTGGCTCCAGGAAAACACGG-3'   |
|           |       | FST-H-F    | 5'-GCCAGTGACAATGCCACATACG-3'   |
| FST       | Mouse | FST-H-R    | 5'-CTTCCTCCGTTTCTTCCGAGATG-3'  |
|           |       | PDGFC-H-F  | 5'-GAGTCCAACCTGAGCAGCAAGT-3'   |
| PDGFC     | Mouse | PDGFC-H-R  | 5'-GAAACTTCGGGCTGTGGATGCT-3'   |
|           |       | FAP-H-F    | 5'-CCGCGTAACACAGGATTCACTG-3'   |
| FAP       | Mouse | FAP-H-R    | 5'-CACACTTCTTGCTCGGAGGAGA-3'   |
|           |       | LOX-H-F    | 5'-CATCGGACTTCTTACCAAGCCG-3'   |
| LOX       | Mouse | LOX-H-R    | 5'-GGCATCAAGCAGGTCATAGTGG-3'   |
|           |       | JAG-H-F    | 5'-TGCGTGGTCAATGGAGACTCCT-3'   |
| JAG1      | Mouse | JAG1-H-R   | 5'-TCGCACCGATAACCAGTTGTCTC-3'  |
|           |       | PCSK5-H-F  | 5'-CGATGGCAAGACTGTGGATG-3'     |
| PCSK5     | Mouse | PCSK5-H-R  | 5'-TTTCTTTCCACTTTCGGCCG-3'     |
|           |       | COL8A1-H-F | 5'-GAGTGTCTCTGGCGGCGGA-3'      |
| COL8A1    | Mouse | COL8A1-H-R | 5'-AGTCCATTGGCAGCATCGGTAG-3'   |
|           |       | RSPO3-H-F  | 5'-CCAAGTGGATATTACGGAACCTCG-3' |

|        |       |            |                               |
|--------|-------|------------|-------------------------------|
| MMP19  | Mouse | RSPO3-H-R  | 5'-CGCAACTGTCAAGGCACTTTCC-3'  |
|        |       | MMP19-H-F  | 5'-AGGCACTCATGGCTCCTGTCTA-3'  |
|        |       | MMP19-H-R  | 5'-TGAGCATCTCGGTCTCTTCCTC-3'  |
| PRRX1  | Mouse | PRRX1-H-F  | 5'-GACCAACCGATTATCTCTCCTGG-3' |
|        |       | PRRX1-H-R  | 5'-CAGTCTCAGGTTGGCAATGCTG-3'  |
| UNC5B  | Mouse | UNC5B-H-F  | 5'-GGACAGTTACCACAACCTACGC-3'  |
|        |       | UNC5B-H-R  | 5'-CTGCCATTCCAGACGTGGTAGA-3'  |
| HGF    | Mouse | HGF-H-F    | 5'-GTCCTGAAGGCTCAGACTTGGT-3'  |
|        |       | HGF-H-R    | 5'-CCAGCCGTAAATACTGCAAGTGG-3' |
| HES1   | Mouse | HES1-H-F   | 5'-GGAAATGACTGTGAAGCACCTCC-3' |
|        |       | HES1-H-R   | 5'-GAAGCGGGTCACCTCGTTCATG-3'  |
| HEY2   | Mouse | HEY2-H-F   | 5'-TGAAGATGCTCCAGGCTACAGG-3'  |
|        |       | HEY2-H-R   | 5'-CCTTCCACTGAGCTTAGGTACC-3'  |
| DCN    | Mouse | DCN-H-F    | 5'-ACTCTCCAGGAACTTCGTGTCC-3'  |
|        |       | DCN-H-R    | 5'-AGTCCCTGGAAGGCTCCGTTTT-3'  |
| NOTCH2 | Mouse | NOTCH2-H-F | 5'-CCACCTGCAATGACTTCATCGG-3'  |
|        |       | NOTCH2-H-R | 5'-TCGATGCAGGTGCCTCCATTCT-3'  |
| COL1A1 | Mouse | COL1A1-H-F | 5'-CCTCAGGGTATTGCTGGACAAC-3'  |
|        |       | COL1A1-H-R | 5'-CAGAAGGACCTTGTTTGCCAGG-3'  |

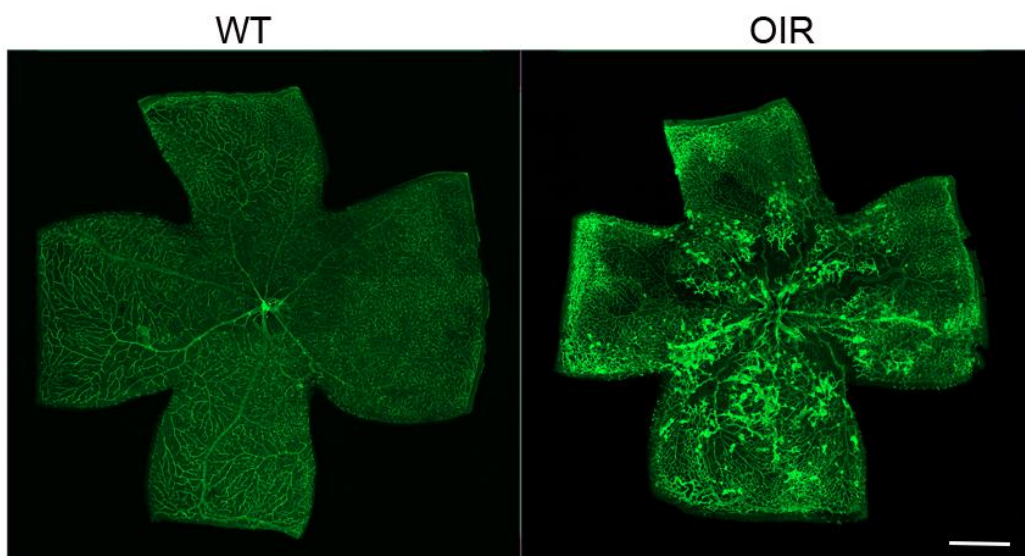

**Supplementary Figure S1.** Pathological NV was established in an oxygen-induced retinopathy (OIR) mouse model. Scale bar, 500  $\mu$ m.

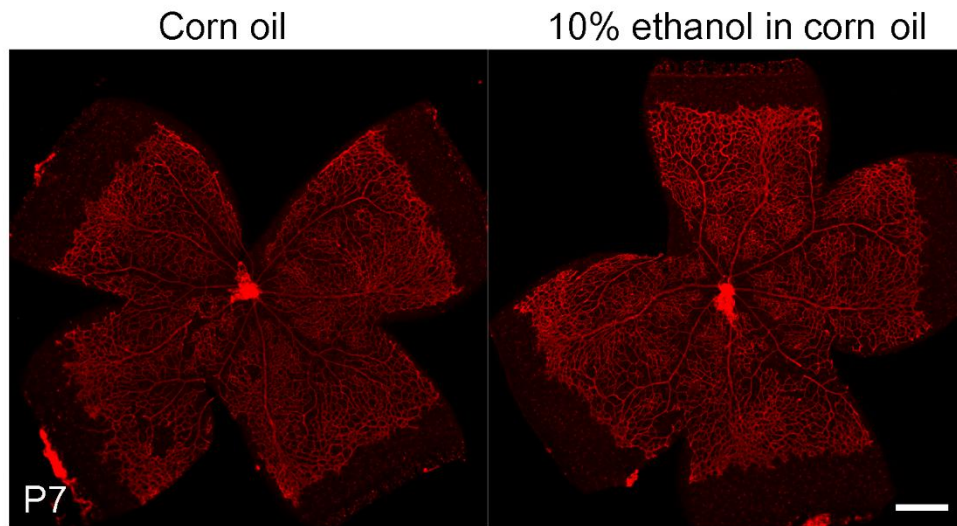

**Supplementary Figure S2.** IB4 staining of retinal whole mounts showed that 10% ethanol had no effect on normal retinal angiogenesis. Scale bar, 500  $\mu\text{m}$ .

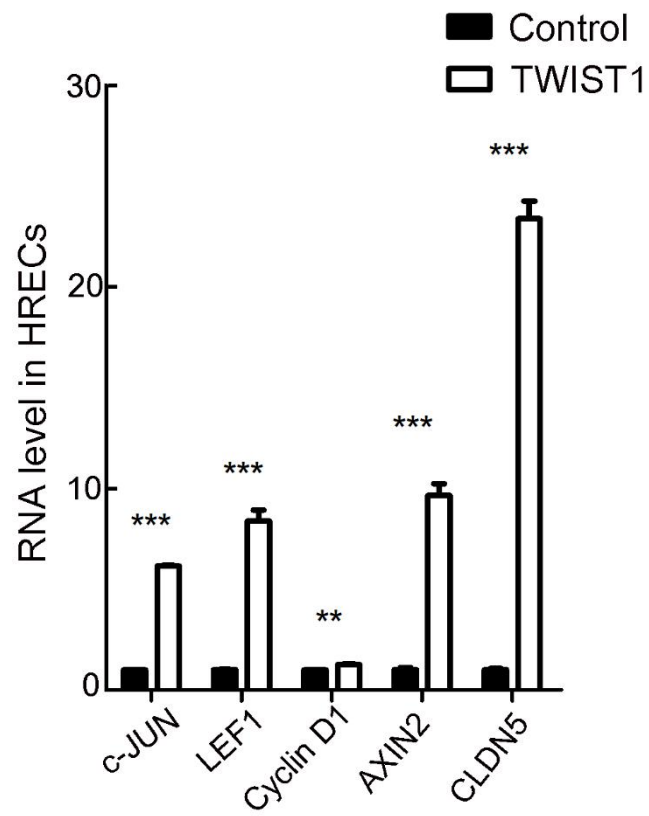

**Supplementary Figure S3.** RT-qPCR showed that expression of downstream genes in Wnt/ $\beta$ -catenin signaling pathway increased after overexpression of *Twist1* in ECs.
